# Supplementary material for: Reduced graphene oxide/gold tetraphenyl porphyrin (RGO/Au–TPP) nanocomposite as an ultrasensitive amperometric sensor for environmentally toxic hydrazine
Source: Royal Society of Chemistry journal article supplement (doi:10.1039/c6ra09129f), 2016-01-01

## Supporting information,

### Ultrasensitive an amperometric environmental toxic hydrazine sensor of reduced graphene oxide / gold tetraphenyl porphyrin (RGO/Au-TPP) nanocomposite

Subramanian Sakthinathan<sup>a</sup>, Subbiramaniyan Kubendhiran<sup>a</sup>, Shen-Ming Chen<sup>a\*</sup>, P.Tamizhdurai<sup>b</sup>

<sup>a</sup>*Electroanalysis and Bioelectrochemistry Lab, Department of Chemical Engineering and Biotechnology, National Taipei University of Technology, No.1, Section 3, Chung-Hsiao East Road, Taipei 106, Taiwan (R.O.C).*

<sup>b</sup>*National Centre For Catalysis Research, Indian Institute of Technology, Chennai, India*

#### Figure captions,

**Figure S1** NMR data for Tetra phenyl Porphyrin (TPP).

**Figure S2** NMR data for Gold Tetra Phenyl Porphyrin (Au-TPP).

**Figure S3** Optimization of RGO/Au-TPP coated on the GCE.

**Figure S4** Cyclic voltammetry of electrochemical reduction GO/Au-TPP.

**Figure S5**, Thermogravimetric analysis (TGA) of (a) RGO, (b) Au-TPP and (c) RGO/Au-TPP.

**Figure S6**, CVs of (b) Au-TPP modified electrodes in PBS (pH 7) containing 200  $\mu$ M hydrazine at the scan rate 50  $\text{mVs}^{-1}$  and the CVs of (Inset) Au-TPP modified electrode in absence of hydrazine.

Figure S1,

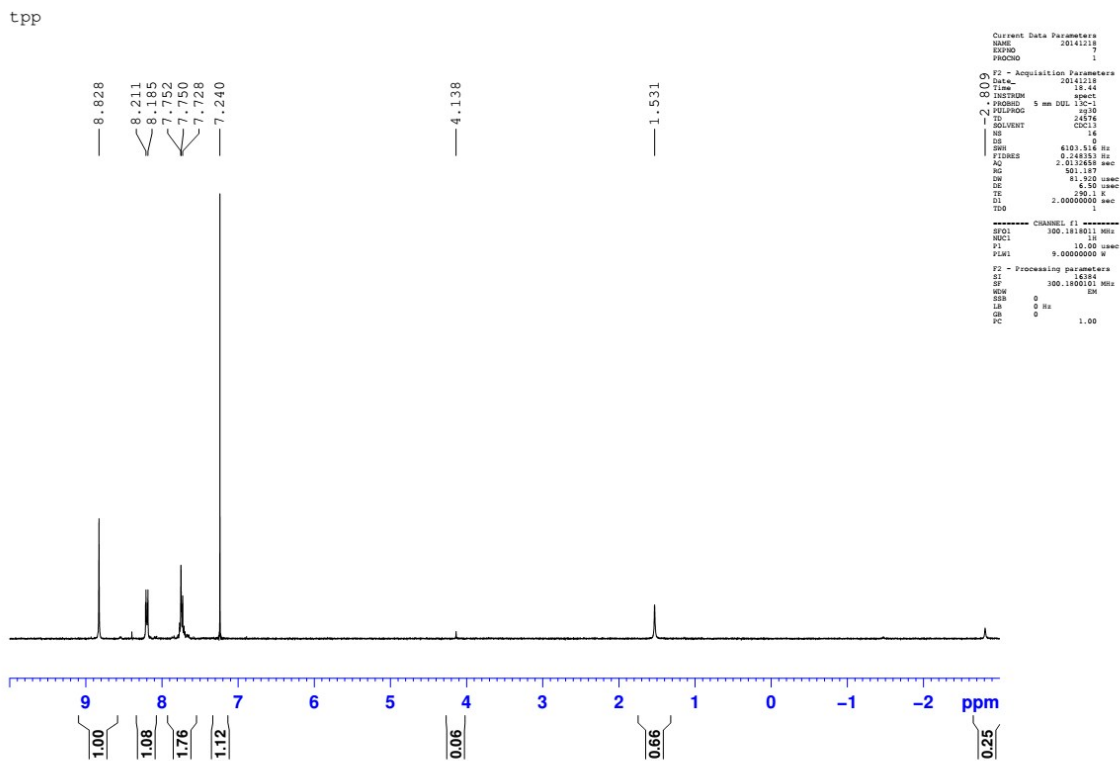

Figure S2,

Au TPP

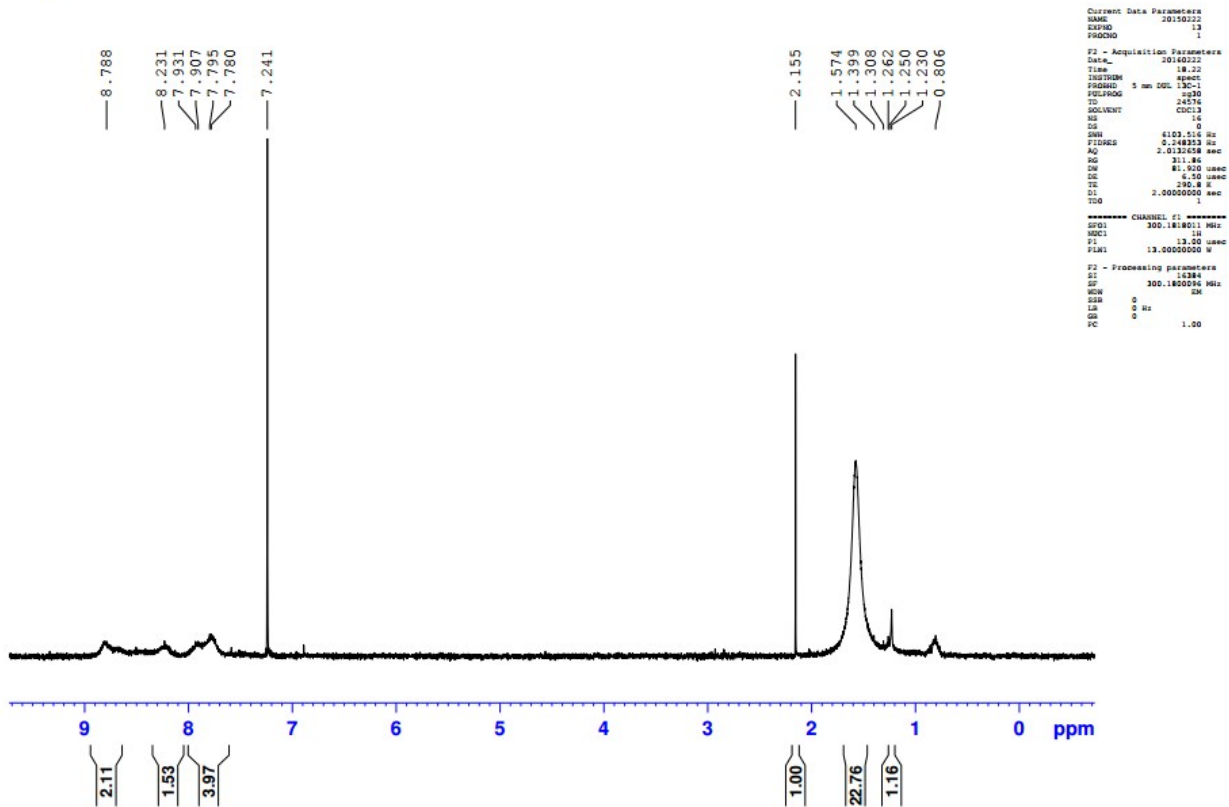

Figure S3,

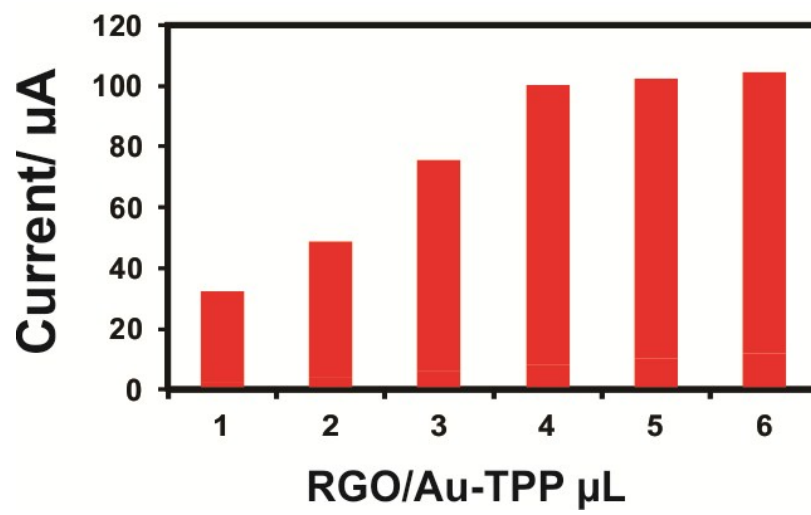

Figure S4,

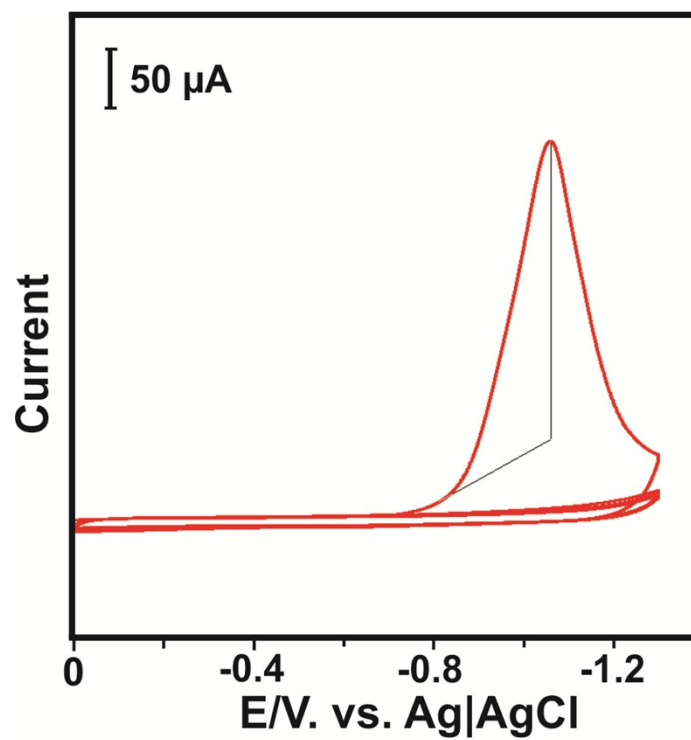

Figure S5,

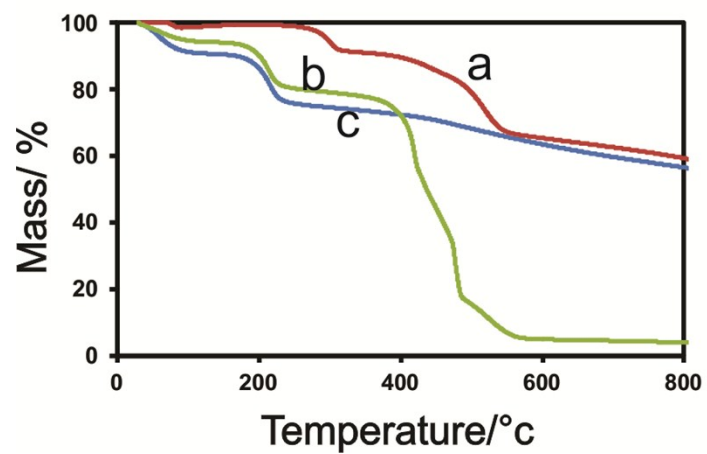

Figure S6,

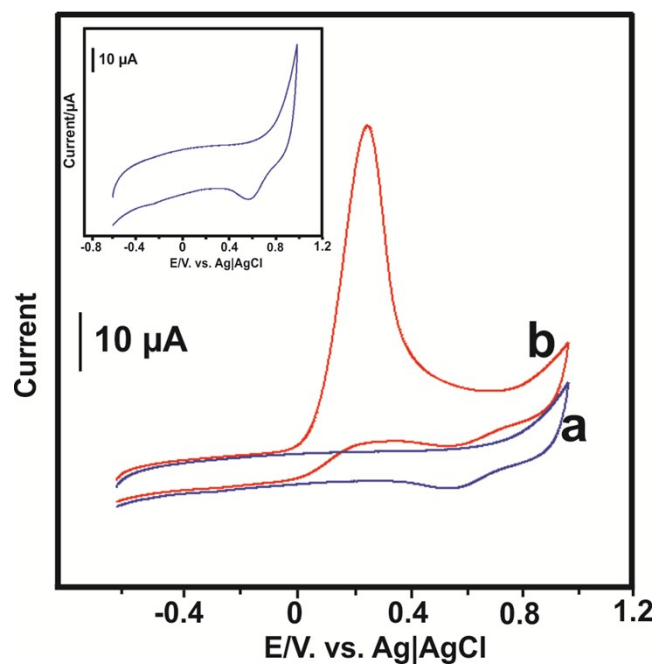

Supplement: c6ra09129f1.pdf [file c6ra09129f1.pdf]
